# Supplementary material for: Altered Cerebral Curvature in Preterm Infants Is Associated with the Common Genetic Variation Related to Autism Spectrum Disorder and Lipid Metabolism
Source: MDPI journal article supplement (doi:10.3390/jcm11113135), 2022-05-31
Supplement: s1 [file s1]

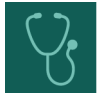

# Supplementary Materials

**Table S1.** Genotype effects on brain curvature.

| Gene         | SNPs      | Age-adjusted/FDR            |                            |                       |                           |                         |                             |                            |                       |                           |                         |
|--------------|-----------|-----------------------------|----------------------------|-----------------------|---------------------------|-------------------------|-----------------------------|----------------------------|-----------------------|---------------------------|-------------------------|
|              |           | Left Hemisphere             |                            |                       |                           |                         | Right Hemisphere            |                            |                       |                           |                         |
|              |           | Lateral Orbitofrontal Gyrus | Medial Orbitofrontal Gyrus | Parahippocampal Gyrus | Posterior Cingulate Gyrus | Superior Temporal Gyrus | Lateral Orbitofrontal Gyrus | Medial Orbitofrontal Gyrus | Parahippocampal Gyrus | Posterior Cingulate Gyrus | Superior Temporal Gyrus |
| <i>OXTR</i>  | rs1042778 | 0.850/0.982                 | 0.033/0.414                | 0.899/0.981           | 0.680/0.765               | 0.080/0.240             | 0.098/0.528                 | <0.001/<0.001              | 0.394/0.974           | 0.273/0.734               | 0.005/0.043             |
| <i>OXTR</i>  | rs2268493 | 0.399/0.857                 | 0.287/0.575                | 0.749/0.981           | 0.013/0.034               | 0.045/0.230             | 0.100/0.528                 | 0.035/0.079                | 0.400/0.974           | 0.260/0.734               | 0.017/0.057             |
| <i>OXTR</i>  | rs53576   | 0.564/0.890                 | 0.224/0.575                | 0.547/0.923           | 0.015/0.034               | 0.027/0.230             | 0.175/0.528                 | 0.016/0.075                | 0.711/0.990           | 0.260/0.734               | 0.002/0.041             |
| <i>FADS2</i> | rs174570  | 0.508/0.857                 | 0.329/0.575                | 0.819/0.981           | 0.011/0.034               | 0.051/0.230             | 0.193/0.528                 | 0.021/0.075                | 0.799/0.974           | 0.386/0.734               | 0.008/0.043             |
| <i>FADS2</i> | rs174576  | 0.743/0.912                 | 0.256/0.575                | 0.911/0.981           | <0.001/<0.001             | 0.023/0.230             | 0.187/0.528                 | 0.023/0.075                | 0.736/0.990           | 0.473/0.749               | 0.007/0.043             |
| <i>FADS2</i> | rs498793  | 0.668/0.890                 | 0.751/0.819                | 0.429/0.827           | 0.015/0.034               | 0.041/0.230             | 0.036/0.528                 | 0.054/0.104                | 0.933/0.990           | 0.181/0.734               | 0.003/0.041             |
| <i>COMT</i>  | rs740603  | 0.488/0.857                 | 0.588/0.756                | 0.703/0.981           | 0.012/0.034               | 0.143/0.322             | 0.349/0.628                 | 0.002/0.027                | 0.905/0.990           | 0.384/0.734               | 0.010/0.045             |
| <i>COMT</i>  | rs165774  | 0.983/0.983                 | 0.121/0.575                | 0.895/0.981           | <0.001/<0.001             | 0.063/0.240             | 0.094/0.528                 | 0.024/0.075                | 0.760/0.990           | 0.173/0.734               | 0.015/0.057             |
| <i>COMT</i>  | rs174696  | 0.429/0.857                 | 0.555/0.749                | 0.722/0.981           | 0.047/0.098               | 0.101/0.273             | 0.349/0.628                 | 0.024/0.075                | 0.136/0.974           | 0.324/0.734               | 0.037/0.111             |

SNP, single-nucleotide polymorphism; *OXTR*, oxytocin receptor; *FADS2*, fatty acid desaturase 2; *COMT*, catechol-o-methyltransferase; FDR, false discovery rate.

**Table S2.** Genotype effects on brain volume.

| Gene         | SNPs      | Age-adjusted/FDR         |                                             |                                              |                                              |                                               |
|--------------|-----------|--------------------------|---------------------------------------------|----------------------------------------------|----------------------------------------------|-----------------------------------------------|
|              |           | Total Gray Matter Volume | Left Hemisphere Cortical Gray Matter Volume | Right Hemisphere Cortical Gray Matter Volume | Left Hemisphere Cerebral White Matter Volume | Right Hemisphere Cerebral White Matter Volume |
|              |           |                          |                                             |                                              |                                              |                                               |
| <i>OXTR</i>  | rs1042778 | 0.748/0.805              | 0.721/0.972                                 | 0.768/0.839                                  | 0.703/0.992                                  | 0.950/0.995                                   |
| <i>OXTR</i>  | rs2268493 | 0.730/0.805              | 0.972/0.972                                 | 0.548/0.748                                  | 0.901/0.992                                  | 0.816/0.995                                   |
| <i>OXTR</i>  | rs53576   | 0.805/0.805              | 0.821/0.972                                 | 0.839/0.839                                  | 0.992/0.992                                  | 0.995/0.995                                   |
| <i>FADS2</i> | rs174570  | 0.698/0.805              | 0.876/0.972                                 | 0.582/0.748                                  | 0.682/0.992                                  | 0.825/0.995                                   |
| <i>FADS2</i> | rs174576  | 0.613/0.805              | 0.750/0.972                                 | 0.513/0.748                                  | 0.954/0.992                                  | 0.675/0.995                                   |
| <i>FADS2</i> | rs498793  | 0.196/0.805              | 0.428/0.972                                 | 0.267/0.748                                  | 0.321/0.992                                  | 0.125/0.995                                   |
| <i>COMT</i>  | rs740603  | 0.377/0.805              | 0.369/0.972                                 | 0.388/0.748                                  | 0.760/0.992                                  | 0.809/0.995                                   |
| <i>COMT</i>  | rs165774  | 0.583/0.805              | 0.772/0.972                                 | 0.492/0.748                                  | 0.413/0.992                                  | 0.488/0.995                                   |
| <i>COMT</i>  | rs174696  | 0.314/0.805              | 0.265/0.972                                 | 0.164/0.748                                  | 0.689/0.992                                  | 0.452/0.995                                   |

SNP, single-nucleotide polymorphism; *OXTR*, oxytocin receptor; *FADS2*, fatty acid desaturase 2; *COMT*, catechol-o-methyltransferase; FDR, false discovery rate.

**Table S3.** Genotype effects on brain volume in the preterm and control groups controlling for age at scan.

| Gene         | SNPs      | Age-adjusted/P <sub>FDR</sub> |                                             |                                              |                                              |                                               |
|--------------|-----------|-------------------------------|---------------------------------------------|----------------------------------------------|----------------------------------------------|-----------------------------------------------|
|              |           | Total Gray Matter Volume      | Left Hemisphere Cortical Gray Matter Volume | Right Hemisphere Cortical Gray Matter Volume | Left Hemisphere Cerebral White Matter Volume | Right Hemisphere Cerebral White Matter Volume |
|              |           |                               |                                             |                                              |                                              |                                               |
| <i>OXTR</i>  | rs1042778 | 0.113/0.848                   | 0.494/0.943                                 | 0.271/0.933                                  | 0.026/0.330                                  | 0.019/0.304                                   |
| <i>OXTR</i>  | rs2268493 | 0.272/0.848                   | 0.835/0.943                                 | 0.575/0.933                                  | 0.083/0.330                                  | 0.079/0.304                                   |
| <i>OXTR</i>  | rs53576   | 0.151/0.848                   | 0.705/0.943                                 | 0.284/0.933                                  | 0.072/0.330                                  | 0.064/0.304                                   |
| <i>FADS2</i> | rs174570  | 0.188/0.848                   | 0.751/0.943                                 | 0.349/0.943                                  | 0.110/0.330                                  | 0.072/0.304                                   |
| <i>FADS2</i> | rs174576  | 0.189/0.848                   | 0.632/0.943                                 | 0.364/0.943                                  | 0.109/0.330                                  | 0.068/0.304                                   |
| <i>FADS2</i> | rs498793  | 0.201/0.848                   | 0.697/0.943                                 | 0.336/0.933                                  | 0.083/0.330                                  | 0.079/0.304                                   |
| <i>COMT</i>  | rs740603  | 0.332/0.848                   | 0.908/0.943                                 | 0.476/0.933                                  | 0.158/0.388                                  | 0.140/0.378                                   |
| <i>COMT</i>  | rs165774  | 0.073/0.848                   | 0.362/0.943                                 | 0.135/0.933                                  | 0.078/0.330                                  | 0.068/0.304                                   |
| <i>COMT</i>  | rs174696  | 0.323/0.848                   | 0.898/0.943                                 | 0.466/0.933                                  | 0.089/0.330                                  | 0.090/0.304                                   |

SNP, single-nucleotide polymorphism; *OXTR*, oxytocin receptor; *FADS2*, fatty acid desaturase 2; *COMT*, catechol-o-methyltransferase; FDR, false discovery rate.

**Table S4.** Genotype effects on brain thickness.

| Gene         | SNPs      | Age-adjusted/FDR      |                      |                 |                     |                   |                       |                      |                 |                     |                   |
|--------------|-----------|-----------------------|----------------------|-----------------|---------------------|-------------------|-----------------------|----------------------|-----------------|---------------------|-------------------|
|              |           | Left Hemisphere       |                      |                 |                     |                   | Right Hemisphere      |                      |                 |                     |                   |
|              |           | Lateral Orbitofrontal | Medial Orbitofrontal | Parahippocampal | Posterior Cingulate | Superior Temporal | Lateral Orbitofrontal | Medial Orbitofrontal | Parahippocampal | Posterior Cingulate | Superior Temporal |
| <i>OXTR</i>  | rs1042778 | 0.210/0.962           | 0.031/0.155          | 0.296/0.920     | 0.371/0.669         | 0.113/0.917       | 0.253/0.885           | 0.869/0.869          | 0.497/0.688     | 0.682/0.682         | 0.044/0.440       |
| <i>OXTR</i>  | rs2268493 | 0.855/0.962           | 0.989/0.989          | 0.368/0.920     | 0.468/0.669         | 0.751/0.917       | 0.826/0.885           | 0.222/0.740          | 0.529/0.688     | 0.299/0.682         | 0.315/0.525       |
| <i>OXTR</i>  | rs53576   | 0.996/0.996           | 0.512/0.853          | 0.332/0.920     | 0.343/0.669         | 0.569/0.917       | 0.885/0.885           | 0.456/0.869          | 0.799/0.888     | 0.302/0.682         | 0.957/0.957       |
| <i>FADS2</i> | rs174570  | 0.851/0.962           | 0.839/0.989          | 0.789/0.957     | 0.920/0.920         | 0.558/0.917       | 0.749/0.885           | 0.832/0.869          | 0.095/0.605     | 0.575/0.682         | 0.296/0.525       |
| <i>FADS2</i> | rs174576  | 0.610/0.962           | 0.471/0.853          | 0.697/0.957     | 0.764/0.849         | 0.287/0.917       | 0.787/0.885           | 0.768/0.869          | 0.121/0.605     | 0.540/0.682         | 0.215/0.525       |
| <i>FADS2</i> | rs498793  | 0.491/0.962           | 0.932/0.989          | 0.663/0.957     | 0.310/0.669         | 0.780/0.917       | 0.411/0.885           | 0.681/0.869          | 0.499/0.688     | 0.469/0.682         | 0.248/0.525       |
| <i>AP0E</i>  | rs405509  | 0.833/0.962           | 0.958/0.989          | 0.171/0.920     | 0.055/0.550         | 0.536/0.917       | 0.441/0.885           | 0.704/0.869          | 0.550/0.688     | 0.063/0.630         | 0.857/0.952       |
| <i>COMT</i>  | rs740603  | 0.341/0.962           | 0.380/0.853          | 0.979/0.979     | 0.609/0.761         | 0.903/0.917       | 0.482/0.885           | 0.106/0.555          | 0.266/0.688     | 0.269/0.682         | 0.416/0.594       |
| <i>COMT</i>  | rs165774  | 0.682/0.962           | 0.463/0.853          | 0.861/0.957     | 0.444/0.669         | 0.917/0.917       | 0.831/0.885           | 0.427/0.869          | 0.371/0.688     | 0.675/0.682         | 0.787/0.952       |
| <i>COMT</i>  | rs174696  | 0.055/0.962           | 0.031/0.155          | 0.723/0.957     | 0.117/0.585         | 0.521/0.917       | 0.041/0.410           | 0.111/0.555          | 0.940/0.940     | 0.420/0.682         | 0.146/0.525       |

SNP, single-nucleotide polymorphism; *OXTR*, oxytocin receptor; *FADS2*, fatty acid desaturase 2; *COMT*, catechol-o-methyltransferase; FDR, false discovery rate.

**Table S5.** Genotype effects on brain curvature in the preterm and control groups controlling for age at scan.

| Gene         | SNPs      | Age-adjusted/FDR            |                            |                       |                           |                         |                             |                            |                       |                           |                         |
|--------------|-----------|-----------------------------|----------------------------|-----------------------|---------------------------|-------------------------|-----------------------------|----------------------------|-----------------------|---------------------------|-------------------------|
|              |           | Left Hemisphere             |                            |                       |                           |                         | Right Hemisphere            |                            |                       |                           |                         |
|              |           | Lateral Orbitofrontal Gyrus | Medial Orbitofrontal Gyrus | Parahippocampal Gyrus | Posterior Cingulate Gyrus | Superior Temporal Gyrus | Lateral Orbitofrontal Gyrus | Medial Orbitofrontal Gyrus | Parahippocampal Gyrus | Posterior Cingulate Gyrus | Superior Temporal Gyrus |
| <i>OXTR</i>  | rs1042778 | 0.259/0.957                 | 0.044/0.531                | 0.276/0.827           | 0.387/0.992               | 0.112/0.833             | 0.317/0.914                 | 0.980/0.981                | 0.644/0.820           | 0.788/0.851               | 0.070/0.545             |
| <i>OXTR</i>  | rs2268493 | 0.990/0.994                 | 0.581/0.977                | 0.062/0.698           | 0.350/0.992               | 0.270/0.833             | 0.880/0.968                 | 0.911/0.981                | 0.432/0.807           | 0.295/0.556               | 0.456/0.663             |
| <i>OXTR</i>  | rs53576   | 0.427/0.957                 | 0.712/0.977                | 0.139/0.698           | 0.948/0.992               | 0.676/0.879             | 0.417/0.914                 | 0.723/0.981                | 0.296/0.807           | 0.303/0.556               | 0.150/0.545             |
| <i>FADS2</i> | rs174570  | 0.695/0.994                 | 0.673/0.977                | 0.409/0.893           | 0.961/0.992               | 0.520/0.877             | 0.486/0.914                 | 0.941/0.981                | 0.482/0.807           | 0.412/0.654               | 0.198/0.545             |
| <i>FADS2</i> | rs174576  | 0.494/0.957                 | 0.881/0.977                | 0.562/0.972           | 0.992/0.992               | 0.906/0.986             | 0.385/0.914                 | 0.871/0.981                | 0.614/0.820           | 0.615/0.751               | 0.232/0.545             |
| <i>FADS2</i> | rs498793  | 0.994/0.994                 | 0.631/0.977                | 0.329/0.827           | 0.694/0.992               | 0.528/0.877             | 0.968/0.968                 | 0.959/0.981                | 0.408/0.807           | 0.438/0.657               | 0.241/0.545             |
| <i>COMT</i>  | rs740603  | 0.906/0.994                 | 0.453/0.977                | 0.302/0.827           | 0.888/0.992               | 0.395/0.833             | 0.491/0.914                 | 0.789/0.981                | 0.368/0.807           | 0.223/0.556               | 0.263/0.545             |
| <i>COMT</i>  | rs165774  | 0.601/0.994                 | 0.882/0.977                | 0.648/0.972           | 0.822/0.992               | 0.986/0.986             | 0.338/0.914                 | 0.639/0.981                | 0.546/0.819           | 0.513/0.693               | 0.182/0.545             |
| <i>COMT</i>  | rs174696  | 0.897/0.994                 | 0.327/0.977                | 0.273/0.827           | 0.724/0.992               | 0.313/0.833             | 0.876/0.968                 | 0.877/0.981                | 0.458/0.807           | 0.103/0.556               | 0.220/0.545             |

SNP, single-nucleotide polymorphism; *OXTR*, oxytocin receptor; *FADS2*, fatty acid desaturase 2; *COMT*, catechol-o-methyltransferase; FDR, false discovery rate.

**Table S6.** Significance of minor allele frequencies of SNPs and GA.

|              |           | Early Preterm<br>(n = 9) | Late Preterm<br>(n = 11) | Control<br>(n = 6) | Pearson $\chi^2$ |
|--------------|-----------|--------------------------|--------------------------|--------------------|------------------|
| <i>OXTR</i>  | rs1042778 | 0                        | 1                        | 1                  | 0.409            |
| <i>OXTR</i>  | rs2268493 | 3                        | 3                        | 0                  | 0.571            |
| <i>OXTR</i>  | rs53576   | 5                        | 7                        | 3                  | 0.650            |
| <i>FADS2</i> | rs174570  | 5                        | 7                        | 4                  | 0.511            |
| <i>FADS2</i> | rs174576  | 5                        | 7                        | 5                  | 0.569            |
| <i>FADS2</i> | rs498793  | 5                        | 1                        | 0                  | 0.102            |
| <i>COMT</i>  | rs740603  | 6                        | 8                        | 3                  | 0.729            |
| <i>COMT</i>  | rs165774  | 2                        | 3                        | 1                  | 0.985            |
| <i>COMT</i>  | rs174696  | 6                        | 9                        | 3                  | 0.165            |

SNP, single-nucleotide polymorphism; *OXTR*, oxytocin receptor; *FADS2*, fatty acid desaturase 2; *COMT*, catechol-o-methyltransferase; GA, gestational age.

**Table S7.** The sex differences of cerebral development.

| Characteristics                               | Male<br>( <i>n</i> = 15) | Female<br>( <i>n</i> = 11) | <i>p</i> -Value |
|-----------------------------------------------|--------------------------|----------------------------|-----------------|
| Volume                                        |                          |                            |                 |
| Total gray matter volume                      | 107825.85 ± 13431.40     | 106143.82 ± 16315.27       | 0.776           |
| Left hemisphere cortical gray matter volume   | 36660.81 ± 4637.06       | 36482.69 ± 6379.82         | 0.935           |
| Right hemisphere cortical gray matter volume  | 36231.77 ± 4603.25       | 34957.95 ± 5693.85         | 0.534           |
| Left hemisphere cerebral white matter volume  | 73300.92 ± 10143.10      | 65353.17 ± 8864.55         | 0.048           |
| Right hemisphere cerebral white matter volume | 69638.25 ± 7685.66       | 63059.96 ± 8244.22         | 0.047           |
| Thickness                                     |                          |                            |                 |
| Left lateral orbitofrontal gyrus              | 1.08 ± 0.14              | 1.18 ± 0.23                | 0.209           |
| Right lateral orbitofrontal gyrus             | 1.07 ± 0.16              | 1.09 ± 0.17                | 0.708           |
| Left medial orbitofrontal gyrus               | 1.13 ± 0.12              | 1.19 ± 0.19                | 0.371           |
| Right medial orbitofrontal gyrus              | 1.18 ± 0.11              | 1.20 ± 0.23                | 0.749           |
| Left parahippocampal gyrus                    | 1.05 ± 0.16              | 1.05 ± 0.17                | 0.979           |
| Right parahippocampal gyrus                   | 1.05 ± 0.14              | 1.01 ± 0.27                | 0.671           |
| Left posterior cingulate gyrus                | 1.33 ± 0.13              | 1.33 ± 0.15                | 0.909           |
| Right posterior cingulate gyrus               | 1.32 ± 0.13              | 1.37 ± 0.10                | 0.248           |
| Left superior temporal gyrus                  | 1.40 ± 0.11              | 1.41 ± 0.19                | 0.923           |
| Right superior temporal gyrus                 | 1.42 ± 0.11              | 1.40 ± 0.21                | 0.814           |
| Curvature                                     |                          |                            |                 |
| Left lateral orbitofrontal gyrus              | 1.95 ± 0.57              | 2.08 ± 0.68                | 0.595           |
| Right lateral orbitofrontal gyrus             | 2.11 ± 0.59              | 2.10 ± 0.68                | 0.962           |
| Left medial orbitofrontal gyrus               | 1.56 ± 0.41              | 1.69 ± 0.62                | 0.531           |
| Right medial orbitofrontal gyrus              | 1.68 ± 0.56              | 1.49 ± 0.46                | 0.367           |
| Left parahippocampal gyrus                    | 0.50 ± 0.29              | 0.62 ± 0.20                | 0.267           |
| Right parahippocampal gyrus                   | 0.54 ± 0.44              | 0.35 ± 0.24                | 0.204           |
| Left posterior cingulate gyrus                | 0.92 ± 0.44              | 0.74 ± 0.27                | 0.220           |
| Right posterior cingulate gyrus               | 0.90 ± 0.28              | 0.86 ± 0.41                | 0.753           |
| Left superior temporal gyrus                  | 5.27 ± 0.99              | 4.87 ± 0.80                | 0.284           |
| Right superior temporal gyrus                 | 4.53 ± 0.99              | 4.38 ± 0.88                | 0.698           |
